# Supplementary figures and images for: Predictors and long-term prognosis of early and late recurrence for patients undergoing hepatic resection of hepatocellular carcinoma: a large-scale multicenter study
Source: PubMed Central journal article supplement — Hepatobiliary Surg Nutr. 2021 Oct 21;12(2):155–68. doi: 10.21037/hbsn-21-288 (PMC10129892; doi:10.21037/hbsn-21-288), 2021-10-21

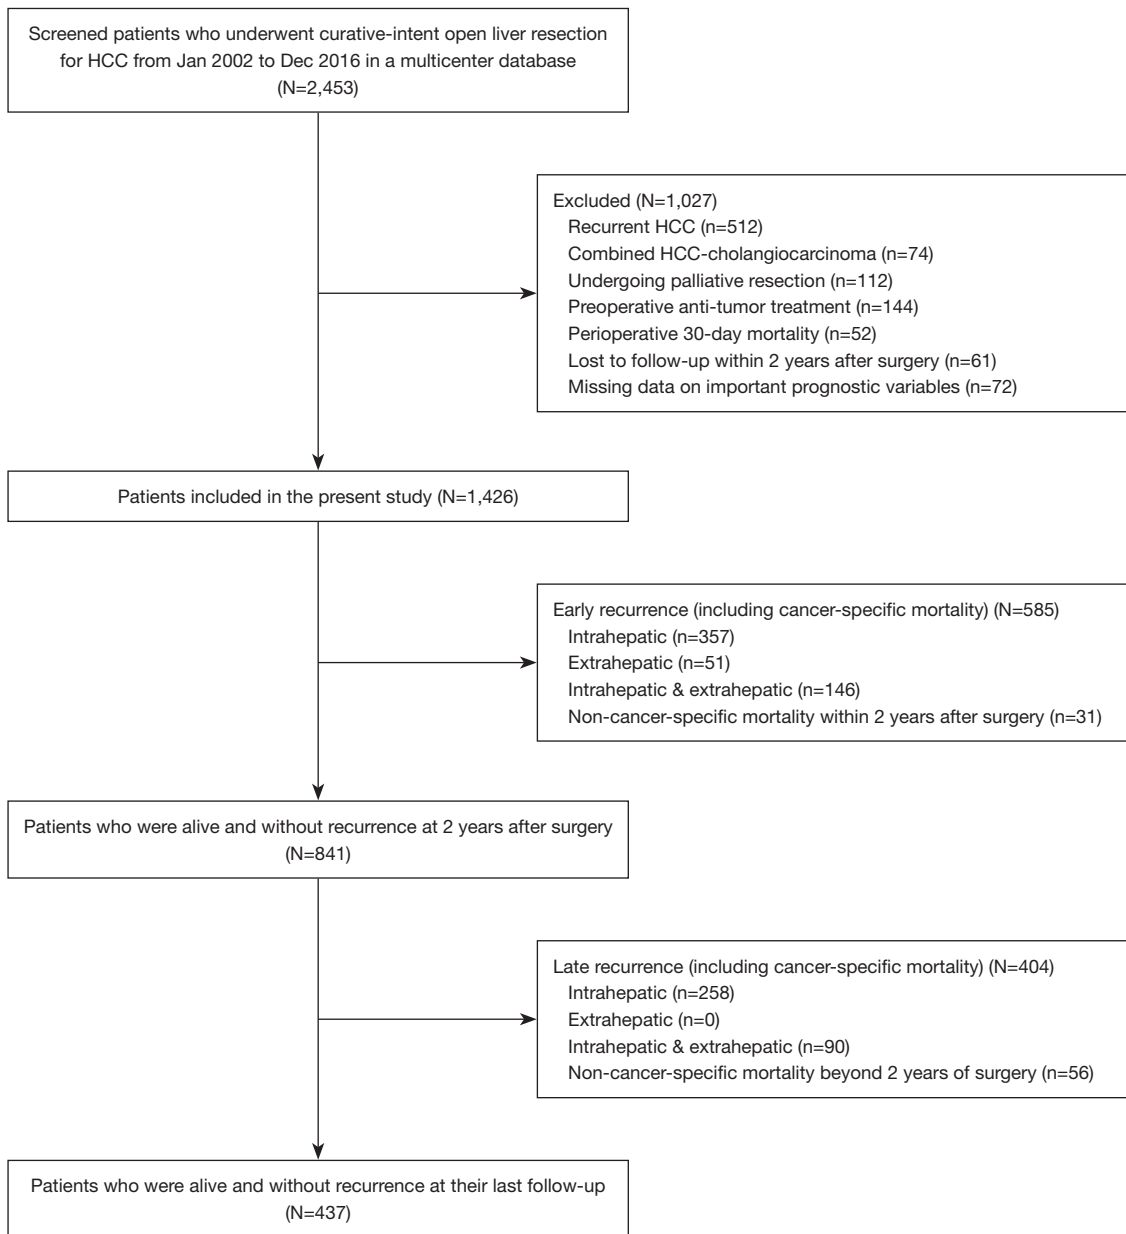

Figure S1 Flowchart of study population. HCC, hepatocellular carcinoma.

Supplement: hbsn-12-02-155-supplementary.pdf [file hbsn-12-02-155-supplementary.pdf]
